# Supplementary material for: Malnutrition-Related Health Outcomes in Older Adults with Hip Fractures: A Systematic Review and Meta-Analysis
Source: MDPI journal article supplement (doi:10.3390/nu16071069), 2024-04-05
Supplement: s1 [file s1]

**Supplementary Table S2A.** New Castle Ottawa Scale of the studied selected of the Cohort studies.

| Cohort Study | Representativeness of the exposed cohort | Selection of the unexposed cohort | Ascertainment of exposure | Outcome of interest not present at start of study | Control for       |                    | Assessment of outcome | Follow-up long enough for outcomes to occur | Adequacy of follow-up of cohorts | Total quality score |
|--------------|------------------------------------------|-----------------------------------|---------------------------|---------------------------------------------------|-------------------|--------------------|-----------------------|---------------------------------------------|----------------------------------|---------------------|
|              |                                          |                                   |                           |                                                   | important factors | additional factors |                       |                                             |                                  |                     |
| 34           | X                                        | X                                 | X                         | X                                                 | X                 | X                  |                       | X                                           | X                                | 8                   |
| 39           | X                                        | X                                 | X                         | X                                                 | X                 | X                  | X                     | X                                           | X                                | 9                   |
| 43           | X                                        | X                                 | X                         | X                                                 | X                 | X                  | X                     |                                             | X                                | 8                   |
| 49           | X                                        | X                                 | X                         | X                                                 | X                 | X                  | X                     |                                             | X                                | 8                   |
| 51           |                                          | X                                 | X                         | X                                                 |                   | X                  | X                     | X                                           | X                                | 7                   |
| 56           | X                                        | X                                 | X                         | X                                                 | X                 |                    | X                     | X                                           | X                                | 8                   |
| 64           | X                                        | X                                 | X                         | X                                                 |                   |                    | X                     | X                                           | X                                | 7                   |
| 68           | X                                        | X                                 | X                         | X                                                 | X                 | X                  | X                     |                                             | X                                | 8                   |
| 70           | X                                        | X                                 | X                         | X                                                 |                   | X                  | X                     | X                                           | X                                | 8                   |
| 72           | X                                        | X                                 | X                         | X                                                 | X                 | X                  | X                     | X                                           | X                                | 9                   |

**Supplementary Table S2B.** New Castle Ottawa Scale of the studied selected of the Case-Control studies.

| Case-Control Study | Adequate definition of cases | Representativeness of cases | Selection of controls | Definition of controls | Comparability     |                    | Ascertainment exposure | Same method of ascertainment for cases and controls | Non-Response rate | Total quality score |
|--------------------|------------------------------|-----------------------------|-----------------------|------------------------|-------------------|--------------------|------------------------|-----------------------------------------------------|-------------------|---------------------|
|                    |                              |                             |                       |                        | important factors | additional factors |                        |                                                     |                   |                     |
| 36                 | X                            | X                           | X                     | X                      | X                 |                    | X                      | X                                                   | X                 | 8                   |
| 53                 | X                            | X                           | X                     | X                      | X                 | X                  | X                      | X                                                   | X                 | 9                   |
| 67                 | X                            | X                           | X                     | X                      |                   |                    | X                      | X                                                   | X                 | 7                   |
| 69                 | X                            | X                           | X                     | X                      |                   |                    | X                      | X                                                   | X                 | 7                   |
