# Supplementary material for: Malnutrition-Related Health Outcomes in Older Adults with Hip Fractures: A Systematic Review and Meta-Analysis
Source: MDPI journal article supplement (doi:10.3390/nu16071069), 2024-04-05
Supplement: s1 [file s1]

**Supplementary Table S1.** Search strategy.

| Database              | Search details                                                                                                                                                                                                                                                                                                                                                                               |
|-----------------------|----------------------------------------------------------------------------------------------------------------------------------------------------------------------------------------------------------------------------------------------------------------------------------------------------------------------------------------------------------------------------------------------|
| <b>PubMed</b>         | ("Nutritional Status"[Mesh] OR MNA[Title/Abstract] OR CONUT[Title/Abstract] OR<br>PNI[Title/Abstract] OR GNRI[Title/Abstract])<br>AND (risk)<br>AND (outcome)<br>AND (((hip[Title/Abstract] OR femoral[Title/Abstract]) AND (injury[Title/Abstract] OR<br>fracture[Title/Abstract]))<br>OR "Proximal Femoral Fractures"[Mesh] OR "Femoral Neck Fractures"[Mesh] OR<br>"Hip Fractures"[Mesh]) |
| <b>Web of Science</b> | Topic:"Nutritional Status" (Mesh) OR MNA OR CONUT OR PNI OR GNRI<br>AND risk<br>AND outcome<br>AND<br>Topic: (("Proximal Femoral Fractures"[Mesh] OR "Femoral Neck Fractures"[Mesh]<br>OR "Hip Fractures"[Mesh]) OR (hip OR femoral) AND (injury OR fracture))                                                                                                                               |
| <b>Scopus</b>         | TAK: ("Nutritional Status" [mesh] OR mna OR conut OR pni OR gnri)<br>AND risk<br>AND outcome<br>AND<br>TAK: (("Proximal Femoral Fractures"[Mesh] OR "Femoral Neck Fractures"[Mesh]<br>OR "Hip Fractures"[Mesh]) OR (hip OR femoral) AND (injury OR fracture))                                                                                                                                |
